# Supplementary material
Source: publisher figshare collection journal article supplement (https://gsajournals.figshare.com/ndownloader/files/13491605)
Supplement: Supplementary file 1 [file 13491605]

## Sheet: Summary
	Up during Infection/ Up in Mutant	Up during Infection/ Down in Mutant	Down during Infection/ Up in Mutant	Down during Infection/ Down in Mutant
6 h	62	44	16	42
24 h	71	56	27	42
48 h	76	66	32	61
All Time points	21	15	3	16

## Sheet: Same Pattern at 6 24 & 48 h
Up during Infection/Up in Mutant
AFLA_ID	Description	6 h	24 h	48 h
AFLA_011440	endoglucanase, putative	6.72065	6.89912	4.89509
AFLA_014190	beta-glucosidase, putative	1.03241	4.04793	3.2081
AFLA_023500	extracellular conserved serine-rich protein	2.73414	2.23674	3.96375
AFLA_025190	extracellular lipase, putative	1.7067	1.35067	1.84494
AFLA_060310	alpha-glucosidase, putative	1.11811	2.77334	2.85395
AFLA_067860	tyrosinase, putative	1.21046	2.24741	2.69143
AFLA_069290	hypothetical protein	3.70283	3.67053	3.75532
AFLA_091500	beta galactosidase, putative	2.25178	4.42987	4.70972
AFLA_094440	spherulin 4-like cell surface protein, putative	1.27976	1.80539	2.17705
AFLA_096130	hypothetical protein	11.1615	9.68416	4.92634
AFLA_101330	hypothetical protein	4.07676	2.52219	1.3814
AFLA_104840	tannase, putative	2.2245	4.59484	1.78377
AFLA_104920	cutinase, putative	4.76921	1.26497	2.58103
AFLA_105500	hypothetical protein	1.43918	1.39062	1.52475
AFLA_106450	GPI anchored CFEM domain protein	1.09163	1.37454	3.90031
AFLA_119690	hypothetical protein	2.20976	3.9808	3.12285
AFLA_119860	pectin lyase, putative	1.12419	3.07946	1.33733
AFLA_121730	alpha-galactosidase C, putative	1.35974	3.74541	2.88123
AFLA_121970	pectate lyase, putative	4.85499	2.94837	4.78379
AFLA_126780	beta-glucosidase 2 precursor, putative	1.52604	6.76268	5.80659
AFLA_138170	exopolygalacturonase precursor, putative	4.178	1.76723	1.66236
Up during Infection/Down in Mutant
AFLA_ID	Description	6 h	24 h	48 h
AFLA_000330	Ankyrin domain protein	-1.59526	-3.44023	-1.4344
AFLA_005390	hypothetical protein	-3.59302	-2.62559	-1.75533
AFLA_014890	hypothetical protein	-5.20096	-6.98678	-3.23582
AFLA_031040	conserved hypothetical protein	-3.06672	-2.37452	-7.54635
AFLA_042900	hypothetical protein	-10.112	-8.12831	-6.00726
AFLA_059610	hypothetical protein	-2.09204	-1.98688	-2.44828
AFLA_059820	hypothetical protein	-2.05142	-1.87032	-2.00316
AFLA_064900	hypothetical protein	-2.29282	-3.43662	-2.81113
AFLA_090560	hypothetical protein	-1.57172	-2.30515	-8.09541
AFLA_107800	exo-beta-1,3-glucanase, putative	-2.21809	-2.84403	-1.42212
AFLA_116650	pectate lyase, putative	-3.32929	-3.42954	-2.38247
AFLA_122400	glucan 1,4-alpha-glucosidase, putative	-6.43211	-2.88259	-2.85723
AFLA_133810	hypothetical protein	-1.39312	-2.59549	-4.31279
AFLA_138310	hypothetical protein	-3.66601	-6.97899	-5.73575
AFLA_139470	FAD dependent oxidoreductase, putative	-9.89534	-8.44066	-6.2575
Down during Infection/Up in Mutant
AFLA_ID	Description	6 h	24 h	48 h
AFLA_009320	hypothetical protein	2.42958	1.64545	2.02267
AFLA_050200	hypothetical protein	8.20762	4.55155	9.33204
AFLA_120180	pheromone processing carboxypeptidase (Sxa2), putative	1.74763	2.18651	2.28288
Down during Infection/Down in Mutant
AFLA_ID	Description	6 h	24 h	48 h
AFLA_001640	glycosyl hydrolase, putative	-1.70887	-3.43354	-6.7684
AFLA_027810	alkaline serine protease Alp1	-1.019	-5.89574	-6.84424
AFLA_032930	conserved hypothetical protein	-1.51712	-2.04639	-3.09069
AFLA_038530	elastinolytic metalloproteinase Mep	-2.43579	-2.99712	-6.61558
AFLA_039400	extracellular guanyl-specific ribonuclease RntA	-2.24751	-1.75357	-3.57786
AFLA_057500	hypothetical protein	-3.38119	-2.81743	-4.95204
AFLA_061110	mono- and diacylglycerol lipase precursor, putative	-6.12207	-6.35093	-5.36803
AFLA_064860	nuclease S1 precursor, putative	-5.62748	-4.90292	-6.00965
AFLA_065540	extracellular lipase, putative	-2.85223	-3.79003	-3.87314
AFLA_085820	conserved hypothetical protein	-1.67391	-2.80954	-1.86626
AFLA_094450	aspartic endopeptidase Pep1/aspergillopepsin F	-2.07879	-1.55837	-4.37384
AFLA_099050	hypothetical protein	-1.47094	-1.40022	-1.5567
AFLA_119150	hypothetical protein	-1.40433	-7.11342	-5.07597
AFLA_119780	neutral protease 2 precursor, putative	-1.64148	-1.14747	-6.53827
AFLA_138790	hypothetical protein	-1.52748	-7.18891	-7.79446
AFLA_139000	hypothetical protein	-4.44715	-10.1855	-7.21407

## Sheet: Up in Infection hbx1 6 h 
AFLA ID	Description	6 h
AFLA_000330	Ankyrin domain protein	-1.59526
AFLA_004810	nuclear pore glycoprotein p62, putative	-2.91125
AFLA_005090	hypothetical protein	-2.3658
AFLA_005390	hypothetical protein	-3.59302
AFLA_007720	pectin lyase	3.1631
AFLA_011370	hypothetical protein	-1.66201
AFLA_011440	endoglucanase, putative	6.72065
AFLA_013780	conserved hypothetical protein	1.7388
AFLA_013880	lipase 2 precursor, putative	-5.13283
AFLA_014190	beta-glucosidase, putative	1.03241
AFLA_014890	hypothetical protein	-5.20096
AFLA_014920	extracellular aspartic endopeptidase, putative	1.80702
AFLA_020000	pectinesterase precursor, putative	2.46783
AFLA_023350	beta-glucosidase, putative	-1.75488
AFLA_023500	extracellular conserved serine-rich protein	2.73414
AFLA_023600	cell wall protein PhiA	3.29285
AFLA_025130	BYS1 domain protein, putative	1.06203
AFLA_025190	extracellular lipase, putative	1.7067
AFLA_028000	BNR/Asp-box repeat domain protein	2.11332
AFLA_031040	conserved hypothetical protein	-3.06672
AFLA_031440	conserved hypothetical protein	-1.75685
AFLA_032670	conserved hypothetical protein	1.67726
AFLA_038270	hypothetical protein	1.98616
AFLA_038520	hypothetical protein	2.41333
AFLA_038920	hypothetical protein	-8.39263
AFLA_039870	histidine acid phosphatase, putative	-1.63028
AFLA_040750	hypothetical protein	-1.6841
AFLA_041970	chitin binding protein, putative	1.68204
AFLA_042900	hypothetical protein	-10.112
AFLA_043860	hypothetical protein	1.26528
AFLA_046500	carboxylesterase, putative	2.00326
AFLA_051140	beta-glucosidase, putative	2.72977
AFLA_051250	GPI anchored serine-rich protein	1.09765
AFLA_053100	hypothetical protein	1.27273
AFLA_056760	hypothetical protein	-1.29243
AFLA_057690	GDSL lipase/acylhydrolase family protein	-1.21852
AFLA_057770	pectate lyase A	1.76842
AFLA_059330	hypothetical protein	-1.8174
AFLA_059610	hypothetical protein	-2.09204
AFLA_059820	hypothetical protein	-2.05142
AFLA_060310	alpha-glucosidase, putative	1.11811
AFLA_061650	hypothetical protein	-1.35069
AFLA_061720	hypothetical protein	5.10098
AFLA_062640	hypothetical protein	-1.52929
AFLA_063040	hypothetical protein	-1.77319
AFLA_063680	esterase, putative	1.19731
AFLA_064620	hypothetical protein	-1.96997
AFLA_064900	hypothetical protein	-2.29282
AFLA_065010	isochorismatase family hydrolase, putative	-2.1703
AFLA_066750	periplasmic beta-glucosidase precursor, putative	-2.92976
AFLA_067000	SCP-like extracellular protein, putative	1.67677
AFLA_067860	tyrosinase, putative	1.21046
AFLA_069290	hypothetical protein	3.70283
AFLA_069610	hypothetical protein	-2.15786
AFLA_070470	hypothetical protein	5.83322
AFLA_070660	hypothetical protein	6.12723
AFLA_070940	extracellular rhamnogalacturonase, putative	-3.70342
AFLA_073080	arabinosidase, putative	-2.54756
AFLA_077840	endoglucanase, putative	1.02326
AFLA_078310	hypothetical protein	-1.25251
AFLA_083730	epoxide hydrolase, putative	-1.11705
AFLA_085140	extracellular thaumatin domain protein, putative	1.25981
AFLA_086360	extracellular exo-polygalacturonase, putative	1.20812
AFLA_089400	extracellular phytase, putative	2.5303
AFLA_089930	rhamnogalacturonase A precursor, putative	2.0841
AFLA_090090	hypothetical protein	-2.0692
AFLA_090560	hypothetical protein	-1.57172
AFLA_091500	beta galactosidase, putative	2.25178
AFLA_094440	spherulin 4-like cell surface protein, putative	1.27976
AFLA_096130	hypothetical protein	11.1615
AFLA_101330	hypothetical protein	4.07676
AFLA_104840	tannase, putative	2.2245
AFLA_104890	hydrolase, putative	2.50876
AFLA_104920	cutinase, putative	4.76921
AFLA_105500	hypothetical protein	1.43918
AFLA_105910	endoglucanase, putative	1.18209
AFLA_105920	extracellular endo-polygalacturonase, putative	1.53278
AFLA_106450	GPI anchored CFEM domain protein	1.09163
AFLA_107430	hypothetical protein	1.69793
AFLA_107800	exo-beta-1,3-glucanase, putative	-2.21809
AFLA_108160	extracellular polygalacturonase, putative	3.1288
AFLA_110270	hypothetical protein	1.19025
AFLA_110330	alkaline phosphatase, putative	-2.57952
AFLA_111970	endoglucanase, putative	1.26281
AFLA_116040	pectin lyase B	1.22833
AFLA_116650	pectate lyase, putative	-3.32929
AFLA_118790	hypothetical protein	-4.21988
AFLA_119690	hypothetical protein	2.20976
AFLA_119860	pectin lyase, putative	1.12419
AFLA_121730	alpha-galactosidase C, putative	1.35974
AFLA_121970	pectate lyase, putative	4.85499
AFLA_122400	glucan 1,4-alpha-glucosidase, putative	-6.43211
AFLA_123660	hypothetical protein	-1.30136
AFLA_124660	pectin lyase precursor, putative	3.19417
AFLA_126430	hypothetical protein	1.17976
AFLA_126780	beta-glucosidase 2 precursor, putative	1.52604
AFLA_131770	extracellular exo-polygalacturonase, putative	-2.49976
AFLA_131820	extracellular dioxygenase, putative	-1.07095
AFLA_133810	hypothetical protein	-1.39312
AFLA_136670	FAD/FMN-containing isoamyl alcohol oxidase MreA-like, putative	2.3609
AFLA_138150	hypothetical protein	3.55724
AFLA_138170	exopolygalacturonase precursor, putative	4.178
AFLA_138310	hypothetical protein	-3.66601
AFLA_138360	endo-1,4-beta-xylanase B precursor, putative	2.78641
AFLA_138690	hypothetical protein	3.32849
AFLA_139470	FAD dependent oxidoreductase, putative	-9.89534

## Sheet: Up in Infection hbx1 24 h 
AFLA ID	Description	24 h
AFLA_000330	Ankyrin domain protein	-3.44023
AFLA_005390	hypothetical protein	-2.62559
AFLA_007480	hypothetical protein	-5.34291
AFLA_007720	pectin lyase	1.85808
AFLA_011000	hypothetical protein	2.47151
AFLA_011060	hypothetical protein	1.79092
AFLA_011360	hypothetical protein	1.29189
AFLA_011420	hypothetical protein	3.73295
AFLA_011440	endoglucanase, putative	6.89912
AFLA_013750	NPP1 domain protein, putative	-4.18948
AFLA_013760	endo-1,4-beta-glucanase, putative	-4.06614
AFLA_013780	conserved hypothetical protein	-2.01226
AFLA_013880	lipase 2 precursor, putative	-1.61731
AFLA_014190	beta-glucosidase, putative	4.04793
AFLA_014890	hypothetical protein	-6.98678
AFLA_016150	lipase, putative	-7.84255
AFLA_016210	arabinosidase, putative	1.06658
AFLA_016240	conserved hypothetical protein	-2.49586
AFLA_016530	beta-galactosidase, putative	-1.03858
AFLA_017100	beta-galactosidase, putative	-1.82404
AFLA_018040	glucose-methanol-choline (gmc) oxidoreductase, putative	2.05752
AFLA_019620	conserved hypothetical protein	-1.02578
AFLA_020000	pectinesterase precursor, putative	-1.22701
AFLA_020430	extracellular dioxygenase, putative	-1.07591
AFLA_021010	hypothetical protein	1.23496
AFLA_023350	beta-glucosidase, putative	-1.63089
AFLA_023500	extracellular conserved serine-rich protein	2.23674
AFLA_023600	cell wall protein PhiA	1.48094
AFLA_025190	extracellular lipase, putative	1.35067
AFLA_028270	esterase family protein	2.21133
AFLA_028880	hypothetical protein	1.339
AFLA_029690	lipase/esterase, putative	1.12648
AFLA_029800	phospholipase D precursor, putative	1.61572
AFLA_031040	conserved hypothetical protein	-2.37452
AFLA_038270	hypothetical protein	1.15322
AFLA_038360	hypothetical protein	1.12449
AFLA_038520	hypothetical protein	-3.89861
AFLA_038920	hypothetical protein	-1.60709
AFLA_039350	cutinase, putative	-2.90559
AFLA_040110	GPI anchored protein, putative	1.27112
AFLA_041970	chitin binding protein, putative	1.3869
AFLA_042900	hypothetical protein	-8.12831
AFLA_043770	hypothetical protein	1.03461
AFLA_051140	beta-glucosidase, putative	1.92887
AFLA_054330	hypothetical protein	2.60447
AFLA_056760	hypothetical protein	2.48162
AFLA_057670	neutral protease 2 precursor, putative	-4.4088
AFLA_057690	GDSL lipase/acylhydrolase family protein	-1.92686
AFLA_057770	pectate lyase A	3.18954
AFLA_059610	hypothetical protein	-1.98688
AFLA_059820	hypothetical protein	-1.87032
AFLA_060280	rhamnogalacturonan acetylesterase RgaE	1.95293
AFLA_060310	alpha-glucosidase, putative	2.77334
AFLA_060380	hypothetical protein	-1.31593
AFLA_064900	hypothetical protein	-3.43662
AFLA_066140	feruloyl esterase A precursor, putative	1.80973
AFLA_066150	endo-1,4-beta-xylanase A precursor, putative	3.34533
AFLA_066750	periplasmic beta-glucosidase precursor, putative	1.50001
AFLA_067860	tyrosinase, putative	2.24741
AFLA_069290	hypothetical protein	3.67053
AFLA_069670	beta-glucosidase 1 precursor, putative	2.14925
AFLA_070470	hypothetical protein	1.31419
AFLA_070940	extracellular rhamnogalacturonase, putative	2.59638
AFLA_072960	glutamate carboxypeptidase, putative	-6.66325
AFLA_073080	arabinosidase, putative	2.01931
AFLA_075190	conserved hypothetical protein	-3.97445
AFLA_076140	hypothetical protein	2.18772
AFLA_077840	endoglucanase, putative	2.63441
AFLA_078310	hypothetical protein	-1.40954
AFLA_083730	epoxide hydrolase, putative	-1.50248
AFLA_085460	conserved hypothetical protein	-1.33754
AFLA_086360	extracellular exo-polygalacturonase, putative	1.23359
AFLA_086510	conserved hypothetical protein	-1.06094
AFLA_089930	rhamnogalacturonase A precursor, putative	-4.49215
AFLA_090560	hypothetical protein	-2.30515
AFLA_091500	beta galactosidase, putative	4.42987
AFLA_092020	hypothetical protein	-4.3254
AFLA_094440	spherulin 4-like cell surface protein, putative	1.80539
AFLA_096130	hypothetical protein	9.68416
AFLA_096690	exopolygalacturonase precursor, putative	2.13539
AFLA_097310	hypothetical protein	-2.60967
AFLA_101230	glutaminase GtaA	-3.2835
AFLA_101330	hypothetical protein	2.52219
AFLA_102190	hypothetical protein	-1.96822
AFLA_102440	hypothetical protein	2.67852
AFLA_104840	tannase, putative	4.59484
AFLA_104920	cutinase, putative	1.26497
AFLA_105500	hypothetical protein	1.39062
AFLA_105910	endoglucanase, putative	-3.8371
AFLA_106450	GPI anchored CFEM domain protein	1.37454
AFLA_107430	hypothetical protein	-1.68666
AFLA_107800	exo-beta-1,3-glucanase, putative	-2.84403
AFLA_107860	hypothetical protein	-2.6778
AFLA_108160	extracellular polygalacturonase, putative	3.72656
AFLA_108500	hypothetical protein	2.88157
AFLA_108860	1,3-beta-glucanosyltransferase Gel2	1.32235
AFLA_110330	alkaline phosphatase, putative	-2.26319
AFLA_116020	hypothetical protein	-2.15795
AFLA_116650	pectate lyase, putative	-3.42954
AFLA_116760	alpha-esterase, putative	1.19966
AFLA_116900	hypothetical protein	3.26706
AFLA_119690	hypothetical protein	3.9808
AFLA_119850	LsdA family protein	-1.03779
AFLA_119860	pectin lyase, putative	3.07946
AFLA_120590	hypothetical protein	2.71696
AFLA_121730	alpha-galactosidase C, putative	3.74541
AFLA_121950	hypothetical protein	4.90411
AFLA_121970	pectate lyase, putative	2.94837
AFLA_122400	glucan 1,4-alpha-glucosidase, putative	-2.88259
AFLA_123170	amylase, putative	5.82284
AFLA_123690	extracellular arabinanase, putative	-2.29268
AFLA_124660	pectin lyase precursor, putative	-2.23028
AFLA_125970	epoxide hydrolase, putative	-1.05866
AFLA_126430	hypothetical protein	2.92339
AFLA_126780	beta-glucosidase 2 precursor, putative	6.76268
AFLA_128870	feruloyl esterase, putative	1.37171
AFLA_133810	hypothetical protein	-2.59549
AFLA_136270	hypothetical protein	1.19388
AFLA_136670	FAD/FMN-containing isoamyl alcohol oxidase MreA-like, putative	1.16876
AFLA_138150	hypothetical protein	-2.18917
AFLA_138170	exopolygalacturonase precursor, putative	1.76723
AFLA_138180	lysozyme, putative	1.84042
AFLA_138310	hypothetical protein	-6.97899
AFLA_138360	endo-1,4-beta-xylanase B precursor, putative	1.72942
AFLA_138380	endoglucanase, putative	2.37937
AFLA_138690	hypothetical protein	-2.52701
AFLA_139470	FAD dependent oxidoreductase, putative	-8.44066

## Sheet: Up in Infection hbx1 48 h 
AFLA ID	Description	48 h
AFLA_000330	Ankyrin domain protein	-1.4344
AFLA_004380	xylosidase : arabinofuranosidase, putative	2.46893
AFLA_004880	amine oxidase, flavin-containing superfamily	-5.80256
AFLA_005390	hypothetical protein	-1.75533
AFLA_006080	hypothetical protein	4.3421
AFLA_007720	pectin lyase	-3.73303
AFLA_008480	CFEM domain protein	-1.37019
AFLA_011000	hypothetical protein	4.47025
AFLA_011060	hypothetical protein	3.84826
AFLA_011360	hypothetical protein	-1.4556
AFLA_011420	hypothetical protein	1.48368
AFLA_011440	endoglucanase, putative	4.89509
AFLA_013750	NPP1 domain protein, putative	-3.48646
AFLA_013760	endo-1,4-beta-glucanase, putative	-1.04056
AFLA_013780	conserved hypothetical protein	-2.36393
AFLA_013880	lipase 2 precursor, putative	1.50219
AFLA_014190	beta-glucosidase, putative	3.2081
AFLA_014890	hypothetical protein	-3.23582
AFLA_016150	lipase, putative	-5.56632
AFLA_016210	arabinosidase, putative	1.5135
AFLA_016240	conserved hypothetical protein	2.01018
AFLA_018040	glucose-methanol-choline (gmc) oxidoreductase, putative	4.12556
AFLA_019290	hypothetical protein	4.20864
AFLA_019620	conserved hypothetical protein	-1.92283
AFLA_019970	conserved hypothetical protein	1.52586
AFLA_020430	extracellular dioxygenase, putative	-1.71202
AFLA_021010	hypothetical protein	2.95867
AFLA_023250	conserved hypothetical protein	-1.17362
AFLA_023300	conserved hypothetical protein	-3.13723
AFLA_023350	beta-glucosidase, putative	1.4296
AFLA_023370	conserved hypothetical protein	4.12127
AFLA_023500	extracellular conserved serine-rich protein	3.96375
AFLA_023600	cell wall protein PhiA	-1.4538
AFLA_025060	GPI anchored protein, putative	-2.65374
AFLA_025130	BYS1 domain protein, putative	4.24363
AFLA_025190	extracellular lipase, putative	1.84494
AFLA_028270	esterase family protein	2.30959
AFLA_028880	hypothetical protein	-2.78625
AFLA_029800	phospholipase D precursor, putative	-1.40405
AFLA_031040	conserved hypothetical protein	-7.54635
AFLA_031440	conserved hypothetical protein	-1.77308
AFLA_038270	hypothetical protein	-3.4749
AFLA_038360	hypothetical protein	-1.74487
AFLA_038730	mannan endo-1,4-beta-mannosidase A precursor, putative	-4.50985
AFLA_038920	hypothetical protein	2.7244
AFLA_039870	histidine acid phosphatase, putative	-3.05823
AFLA_040100	hypothetical protein	-5.03725
AFLA_040750	hypothetical protein	-4.53377
AFLA_042900	hypothetical protein	-6.00726
AFLA_043770	hypothetical protein	2.52324
AFLA_046500	carboxylesterase, putative	1.3967
AFLA_053100	hypothetical protein	-1.16549
AFLA_053570	hypothetical protein	1.67158
AFLA_054330	hypothetical protein	1.23749
AFLA_056760	hypothetical protein	1.71441
AFLA_057670	neutral protease 2 precursor, putative	-4.61737
AFLA_058120	hypothetical protein	4.79781
AFLA_059280	hypothetical protein	-7.19175
AFLA_059330	hypothetical protein	2.2583
AFLA_059500	extracellular endo-1,5-alpha-L-arabinase, putative	-2.96631
AFLA_059610	hypothetical protein	-2.44828
AFLA_059710	homeobox-containing protein wariai, putative	1.56966
AFLA_059820	hypothetical protein	-2.00316
AFLA_060280	rhamnogalacturonan acetylesterase RgaE	1.23594
AFLA_060310	alpha-glucosidase, putative	2.85395
AFLA_061650	hypothetical protein	-1.42665
AFLA_062640	hypothetical protein	-10.9749
AFLA_063040	hypothetical protein	3.96327
AFLA_063680	esterase, putative	1.97999
AFLA_064900	hypothetical protein	-2.81113
AFLA_066140	feruloyl esterase A precursor, putative	2.2588
AFLA_066150	endo-1,4-beta-xylanase A precursor, putative	2.77052
AFLA_066300	endoglucanase, putative	-2.59537
AFLA_066750	periplasmic beta-glucosidase precursor, putative	2.10822
AFLA_066760	hypothetical protein	3.79635
AFLA_067860	tyrosinase, putative	2.69143
AFLA_069290	hypothetical protein	3.75532
AFLA_069670	beta-glucosidase 1 precursor, putative	3.52613
AFLA_070020	alpha-L-arabinofuranosidase	1.3118
AFLA_070660	hypothetical protein	3.83232
AFLA_072960	glutamate carboxypeptidase, putative	-6.16656
AFLA_073080	arabinosidase, putative	2.94367
AFLA_075190	conserved hypothetical protein	-6.29335
AFLA_076140	hypothetical protein	3.34648
AFLA_076820	glucose oxidase, putative	2.84781
AFLA_077840	endoglucanase, putative	-4.1831
AFLA_085870	conserved hypothetical protein	-1.97386
AFLA_088610	lactonohydrolase, putative	-1.17653
AFLA_089460	hypothetical protein	-3.39824
AFLA_089930	rhamnogalacturonase A precursor, putative	1.18729
AFLA_090090	hypothetical protein	4.89668
AFLA_090560	hypothetical protein	-8.09541
AFLA_091500	beta galactosidase, putative	4.70972
AFLA_092020	hypothetical protein	-4.32309
AFLA_094440	spherulin 4-like cell surface protein, putative	2.17705
AFLA_096120	arylsulfatase, putative	-3.24534
AFLA_096130	hypothetical protein	4.92634
AFLA_096690	exopolygalacturonase precursor, putative	1.44671
AFLA_101230	glutaminase GtaA	-3.62197
AFLA_101330	hypothetical protein	1.3814
AFLA_102190	hypothetical protein	-3.36711
AFLA_102440	hypothetical protein	4.85389
AFLA_104840	tannase, putative	1.78377
AFLA_104920	cutinase, putative	2.58103
AFLA_105500	hypothetical protein	1.52475
AFLA_106450	GPI anchored CFEM domain protein	3.90031
AFLA_107800	exo-beta-1,3-glucanase, putative	-1.42212
AFLA_107860	hypothetical protein	-3.93802
AFLA_108500	hypothetical protein	4.6785
AFLA_108860	1,3-beta-glucanosyltransferase Gel2	1.8105
AFLA_113270	acid sphingomyelinase, putative	-3.0302
AFLA_116020	hypothetical protein	-1.04032
AFLA_116040	pectin lyase B	1.98347
AFLA_116630	(S)-2-hydroxy-acid oxidase, putative	-5.26759
AFLA_116650	pectate lyase, putative	-2.38247
AFLA_116760	alpha-esterase, putative	6.27029
AFLA_116900	hypothetical protein	3.1121
AFLA_118690	hypothetical protein	2.72788
AFLA_118790	hypothetical protein	-9.44854
AFLA_119690	hypothetical protein	3.12285
AFLA_119790	beta-xylosidase	2.5826
AFLA_119850	LsdA family protein	-6.08166
AFLA_119860	pectin lyase, putative	1.33733
AFLA_120590	hypothetical protein	2.42225
AFLA_121730	alpha-galactosidase C, putative	2.88123
AFLA_121950	hypothetical protein	5.58596
AFLA_121970	pectate lyase, putative	4.78379
AFLA_122380	arylsulfatase, putative	-2.00457
AFLA_122400	glucan 1,4-alpha-glucosidase, putative	-2.85723
AFLA_123170	amylase, putative	-1.09077
AFLA_123690	extracellular arabinanase, putative	-2.8276
AFLA_125970	epoxide hydrolase, putative	3.2269
AFLA_126780	beta-glucosidase 2 precursor, putative	5.80659
AFLA_128120	cell wall glucanase, putative	1.07484
AFLA_128870	feruloyl esterase, putative	1.28048
AFLA_131770	extracellular exo-polygalacturonase, putative	1.37712
AFLA_133810	hypothetical protein	-4.31279
AFLA_138170	exopolygalacturonase precursor, putative	1.66236
AFLA_138310	hypothetical protein	-5.73575
AFLA_138380	endoglucanase, putative	-1.79278
AFLA_138690	hypothetical protein	-11.0356
AFLA_139470	FAD dependent oxidoreductase, putative	-6.2575

## Sheet: Down in Infection hbx1 6 h 
AFLA ID	Description	6 h
AFLA_000890	laccase TilA	-2.7136
AFLA_001640	glycosyl hydrolase, putative	-1.70887
AFLA_002020	spherulin 4-like cell surface protein, putative	1.43359
AFLA_007560	F5/8 type C domain protein	4.47785
AFLA_009320	hypothetical protein	8.20762
AFLA_010120	extracellular dioxygenase, putative	-1.11133
AFLA_011550	tannase, putative	-1.16272
AFLA_012020	carboxypeptidase S1, putative	-1.40344
AFLA_016360	PAF acetylhydrolase family protein	1.1889
AFLA_017740	conserved hypothetical protein	-3.2816
AFLA_018910	elastase, putative	1.23677
AFLA_019190	aspartyl protease, putative	-4.14199
AFLA_023610	conserved hypothetical protein	-1.03836
AFLA_024300	amidase, putative	-2.00224
AFLA_027810	alkaline serine protease Alp1	-1.019
AFLA_028260	exo-beta-1,3-glucanase (Exg1), putative	1.9364
AFLA_032930	conserved hypothetical protein	-1.51712
AFLA_038530	elastinolytic metalloproteinase Mep	-2.43579
AFLA_039400	extracellular guanyl-specific ribonuclease RntA	-2.24751
AFLA_042890	hypothetical protein	-3.22456
AFLA_045660	multicopper oxidase/laccase, putative	1.51765
AFLA_050200	hypothetical protein	2.42958
AFLA_056870	hypothetical protein	-2.92718
AFLA_057500	hypothetical protein	-3.38119
AFLA_061110	mono- and diacylglycerol lipase precursor, putative	-6.12207
AFLA_063260	hypothetical protein	2.83393
AFLA_064860	nuclease S1 precursor, putative	-5.62748
AFLA_065540	extracellular lipase, putative	-2.85223
AFLA_067550	1,4-beta-D-glucan-cellobiohydrolyase, putative	1.30164
AFLA_074440	hypothetical protein	2.36895
AFLA_074960	conserved hypothetical protein	-2.50496
AFLA_075370	FAD binding domain protein	-2.78562
AFLA_077650	conserved hypothetical protein	-2.3863
AFLA_085820	conserved hypothetical protein	-1.67391
AFLA_094270	hypothetical protein	-6.19431
AFLA_094450	aspartic endopeptidase Pep1/aspergillopepsin F	-2.07879
AFLA_096380	FAD dependent oxidoreductase, putative	-2.32538
AFLA_099050	hypothetical protein	-1.47094
AFLA_104760	acid phosphatase, putative	-1.19425
AFLA_105270	hypothetical protein	2.79024
AFLA_107410	glucose-methanol-choline (gmc) oxidoreductase, putative	1.80222
AFLA_107990	lysosomal protective protein precursor, putative	-2.72455
AFLA_109490	glutamate carboxypeptidase, putative	5.62571
AFLA_116940	hypothetical protein	-1.11985
AFLA_119150	hypothetical protein	-1.40433
AFLA_119780	neutral protease 2 precursor, putative	-1.64148
AFLA_120180	pheromone processing carboxypeptidase (Sxa2), putative	1.74763
AFLA_120380	tyrosinase, putative	-1.6286
AFLA_121230	L-amino acid oxidase LaoA	-3.41445
AFLA_123860	cytochrome P450, putative	-1.11777
AFLA_124890	hypothetical protein	-3.57278
AFLA_125650	hypothetical protein	-2.78746
AFLA_126070	hypothetical protein	-2.78146
AFLA_126750	extracellular glycine-rich protein	-2.82359
AFLA_131910	hypothetical protein	-2.22677
AFLA_138230	6-hydroxy-D-nicotine oxidase, putative	4.76194
AFLA_138790	hypothetical protein	-1.52748
AFLA_139000	hypothetical protein	-4.44715

## Sheet: Down in Infection hbx1 24 h 
AFLA ID	Description	24 h
AFLA_000890	laccase TilA	-3.62327
AFLA_001640	glycosyl hydrolase, putative	-3.43354
AFLA_002090	extracellular serine carboxypeptidase, putative	-1.51665
AFLA_003740	hypothetical protein	-1.49511
AFLA_004140	hypothetical protein	1.89033
AFLA_004190	hypothetical protein	3.44497
AFLA_006340	hypothetical protein	1.9353
AFLA_008930	acid phosphatase AphA	-2.01564
AFLA_009320	hypothetical protein	4.55155
AFLA_012020	carboxypeptidase S1, putative	-3.29581
AFLA_013210	conserved hypothetical protein	1.81529
AFLA_013680	phosphatidylglycerol specific phospholipase C, putative	1.53502
AFLA_014380	glutamate carboxypeptidase, putative	-4.41954
AFLA_017750	conserved hypothetical protein	-4.84252
AFLA_023830	conserved hypothetical protein	1.00474
AFLA_023850	conserved hypothetical protein	1.16966
AFLA_024300	amidase, putative	1.19574
AFLA_027810	alkaline serine protease Alp1	-5.89574
AFLA_032930	conserved hypothetical protein	-2.04639
AFLA_035730	conserved hypothetical protein	1.36611
AFLA_036560	conserved threonine rich protein	-3.29097
AFLA_038530	elastinolytic metalloproteinase Mep	-2.99712
AFLA_039400	extracellular guanyl-specific ribonuclease RntA	-1.75357
AFLA_040330	chitin binding domain protein Peritrophin-A, putative	-3.90519
AFLA_041180	hypothetical protein	-5.5207
AFLA_042600	hypothetical protein	2.53546
AFLA_045290	extracellular endoglucanase/cellulase, putative	2.30878
AFLA_050200	hypothetical protein	1.64545
AFLA_053080	allergen Asp F4-like, putative	2.98624
AFLA_053440	hypothetical protein	-3.8959
AFLA_054220	hypothetical protein	1.10097
AFLA_054660	aspartic-type endopeptidase (OpsB), putative	1.81001
AFLA_056870	hypothetical protein	1.46459
AFLA_057030	beta-glucosidase	-1.06585
AFLA_057500	hypothetical protein	-2.81743
AFLA_059840	hypothetical protein	-2.40671
AFLA_061110	mono- and diacylglycerol lipase precursor, putative	-6.35093
AFLA_063250	glutaminyl-peptide cyclotransferase, putative	-8.67669
AFLA_063260	hypothetical protein	-10.1161
AFLA_064860	nuclease S1 precursor, putative	-4.90292
AFLA_065540	extracellular lipase, putative	-3.79003
AFLA_069820	cellobiohydrolase, putative	-1.59503
AFLA_075800	conserved hypothetical protein	1.28025
AFLA_081980	ferulic acid esterase (FaeA), putative	-2.02688
AFLA_085820	conserved hypothetical protein	-2.80954
AFLA_085960	cell surface protein, putative	-1.15583
AFLA_090060	aspergillopepsin, putative	-1.79949
AFLA_094270	hypothetical protein	-5.11169
AFLA_094280	agmatinase, putative	-4.8286
AFLA_094450	aspartic endopeptidase Pep1/aspergillopepsin F	-1.55837
AFLA_095530	neuroligin, putative	2.18419
AFLA_096380	FAD dependent oxidoreductase, putative	-1.67893
AFLA_097770	hypothetical protein	1.06509
AFLA_099050	hypothetical protein	-1.40022
AFLA_101550	thioredoxin reductase, putative	-1.32337
AFLA_102380	lipase, putative	-1.77394
AFLA_107410	glucose-methanol-choline (gmc) oxidoreductase, putative	1.28736
AFLA_107990	lysosomal protective protein precursor, putative	2.30813
AFLA_113380	hypothetical protein	-5.63849
AFLA_113590	hypothetical protein	1.10896
AFLA_116940	hypothetical protein	1.65814
AFLA_119150	hypothetical protein	-7.11342
AFLA_119780	neutral protease 2 precursor, putative	-1.14747
AFLA_120180	pheromone processing carboxypeptidase (Sxa2), putative	2.18651
AFLA_124890	hypothetical protein	1.52175
AFLA_126750	extracellular glycine-rich protein	1.12444
AFLA_135310	hypothetical protein	-1.68385
AFLA_138790	hypothetical protein	-7.18891
AFLA_139000	hypothetical protein	-10.1855

## Sheet: Down in Infection hbx1 48 h 
AFLA ID	Description	48 h
AFLA_001640	glycosyl hydrolase, putative	-6.7684
AFLA_002020	spherulin 4-like cell surface protein, putative	-7.91786
AFLA_002090	extracellular serine carboxypeptidase, putative	-1.2605
AFLA_003740	hypothetical protein	-1.34448
AFLA_004140	hypothetical protein	-4.24714
AFLA_004190	hypothetical protein	2.88158
AFLA_006820	hypothetical protein	-1.00308
AFLA_007560	F5/8 type C domain protein	-6.98297
AFLA_009320	hypothetical protein	9.33204
AFLA_009820	feruloyl esterase B precursor, putative	3.70955
AFLA_010120	extracellular dioxygenase, putative	-1.05417
AFLA_013210	conserved hypothetical protein	-5.14593
AFLA_013680	phosphatidylglycerol specific phospholipase C, putative	-1.47558
AFLA_014380	glutamate carboxypeptidase, putative	-10.8044
AFLA_016360	PAF acetylhydrolase family protein	3.23813
AFLA_017740	conserved hypothetical protein	-2.72406
AFLA_017750	conserved hypothetical protein	-6.72357
AFLA_018910	elastase, putative	2.4449
AFLA_019190	aspartyl protease, putative	-4.02702
AFLA_023610	conserved hypothetical protein	-5.05149
AFLA_024300	amidase, putative	3.05865
AFLA_027810	alkaline serine protease Alp1	-6.84424
AFLA_028260	exo-beta-1,3-glucanase (Exg1), putative	-4.92585
AFLA_032930	conserved hypothetical protein	-3.09069
AFLA_034090	conserved hypothetical protein	-7.5529
AFLA_034760	conserved hypothetical protein	3.66747
AFLA_036400	conserved hypothetical protein	-5.63311
AFLA_036560	conserved threonine rich protein	-3.38681
AFLA_038530	elastinolytic metalloproteinase Mep	-6.61558
AFLA_038690	phosphoglycerate mutase family protein, putative	-1.63746
AFLA_039400	extracellular guanyl-specific ribonuclease RntA	-3.57786
AFLA_040330	chitin binding domain protein Peritrophin-A, putative	-7.91894
AFLA_040370	membrane copper amine oxidase, putative	5.2223
AFLA_041180	hypothetical protein	-8.19215
AFLA_041450	glutamyl-tRNA(Gln) amidotransferase, subunit A	2.7459
AFLA_041460	hypothetical protein	-1.49501
AFLA_042600	hypothetical protein	2.22111
AFLA_042790	hypothetical protein	5.4387
AFLA_042890	hypothetical protein	2.44379
AFLA_050200	hypothetical protein	2.02267
AFLA_053440	hypothetical protein	-5.79821
AFLA_054220	hypothetical protein	6.47139
AFLA_056870	hypothetical protein	-1.93066
AFLA_057500	hypothetical protein	-4.95204
AFLA_059410	lysophospholipase Plb3	-2.2084
AFLA_059840	hypothetical protein	-3.8691
AFLA_061110	mono- and diacylglycerol lipase precursor, putative	-5.36803
AFLA_063250	glutaminyl-peptide cyclotransferase, putative	-13.189
AFLA_063260	hypothetical protein	-12.1401
AFLA_064860	nuclease S1 precursor, putative	-6.00965
AFLA_065540	extracellular lipase, putative	-3.87314
AFLA_067550	1,4-beta-D-glucan-cellobiohydrolyase, putative	-1.41675
AFLA_069820	cellobiohydrolase, putative	-1.52097
AFLA_074240	conserved hypothetical protein	-4.32589
AFLA_074440	hypothetical protein	3.55263
AFLA_074960	conserved hypothetical protein	-9.10655
AFLA_077650	conserved hypothetical protein	1.21973
AFLA_078590	extracellular matrix protein, putative	-1.23682
AFLA_081980	ferulic acid esterase (FaeA), putative	3.31102
AFLA_082770	conserved hypothetical protein	1.001
AFLA_085820	conserved hypothetical protein	-1.86626
AFLA_090060	aspergillopepsin, putative	-1.03929
AFLA_091650	GPI anchored protein, putative	-1.22633
AFLA_094270	hypothetical protein	1.43602
AFLA_094450	aspartic endopeptidase Pep1/aspergillopepsin F	-4.37384
AFLA_095530	neuroligin, putative	1.16167
AFLA_095560	hypothetical protein	-2.17864
AFLA_097770	hypothetical protein	1.03406
AFLA_099050	hypothetical protein	-1.5567
AFLA_102380	lipase, putative	-2.2827
AFLA_104760	acid phosphatase, putative	-1.91735
AFLA_105270	hypothetical protein	-1.41842
AFLA_107410	glucose-methanol-choline (gmc) oxidoreductase, putative	-4.95036
AFLA_107990	lysosomal protective protein precursor, putative	3.32176
AFLA_109490	glutamate carboxypeptidase, putative	1.76916
AFLA_113380	hypothetical protein	-6.32617
AFLA_116940	hypothetical protein	3.93132
AFLA_117030	hypothetical protein	-2.83858
AFLA_119150	hypothetical protein	-5.07597
AFLA_119780	neutral protease 2 precursor, putative	-6.53827
AFLA_120180	pheromone processing carboxypeptidase (Sxa2), putative	2.28288
AFLA_121230	L-amino acid oxidase LaoA	2.82002
AFLA_122480	extracellular exo-polygalacturonase, putative	1.30619
AFLA_124420	amine oxidase, putative	6.14242
AFLA_124890	hypothetical protein	-3.56032
AFLA_126070	hypothetical protein	2.33219
AFLA_126680	WD repeat-containing protein, putative	-4.22567
AFLA_135310	hypothetical protein	1.97205
AFLA_138230	6-hydroxy-D-nicotine oxidase, putative	2.28701
AFLA_138570	protease S8 tripeptidyl peptidase I, putative	-4.70156
AFLA_138790	hypothetical protein	-7.79446
AFLA_139000	hypothetical protein	-7.21407
AFLA_139050	hypothetical protein	3.56346
